# Supplementary material
Source: MDPI journal article supplement (https://www.mdpi.com/2073-4395/12/4/817)
Supplement: s1 [file s1 › agronomy-1623327-supplementary.pdf]

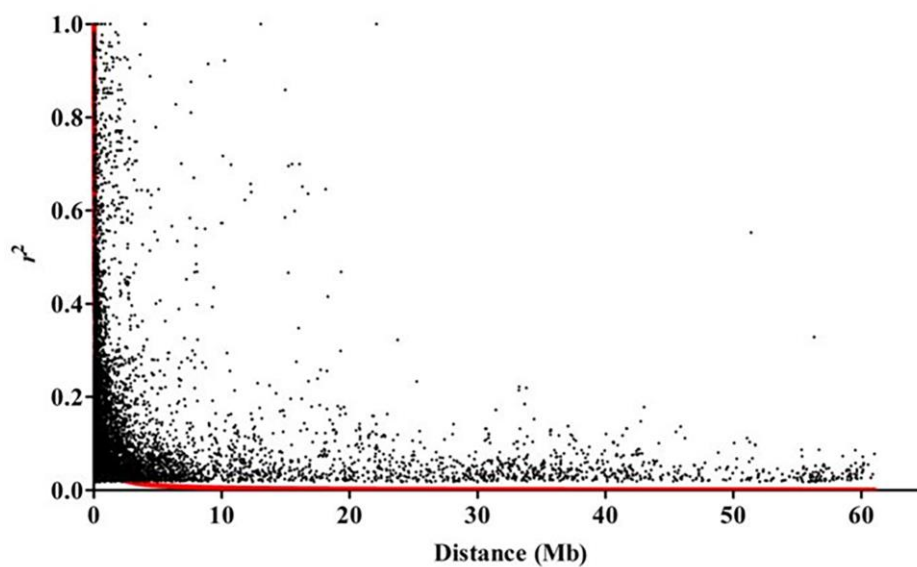

**Figure S1.** Scatter plots and LD decay against physical distance among co-chromosomes.

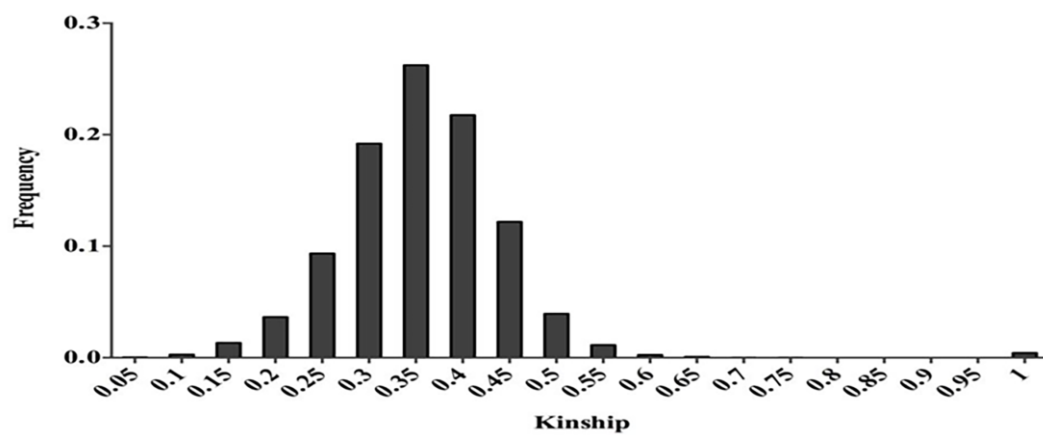

**Figure S2.** Distributions of pairwise relative kinship estimates between mini core collections.

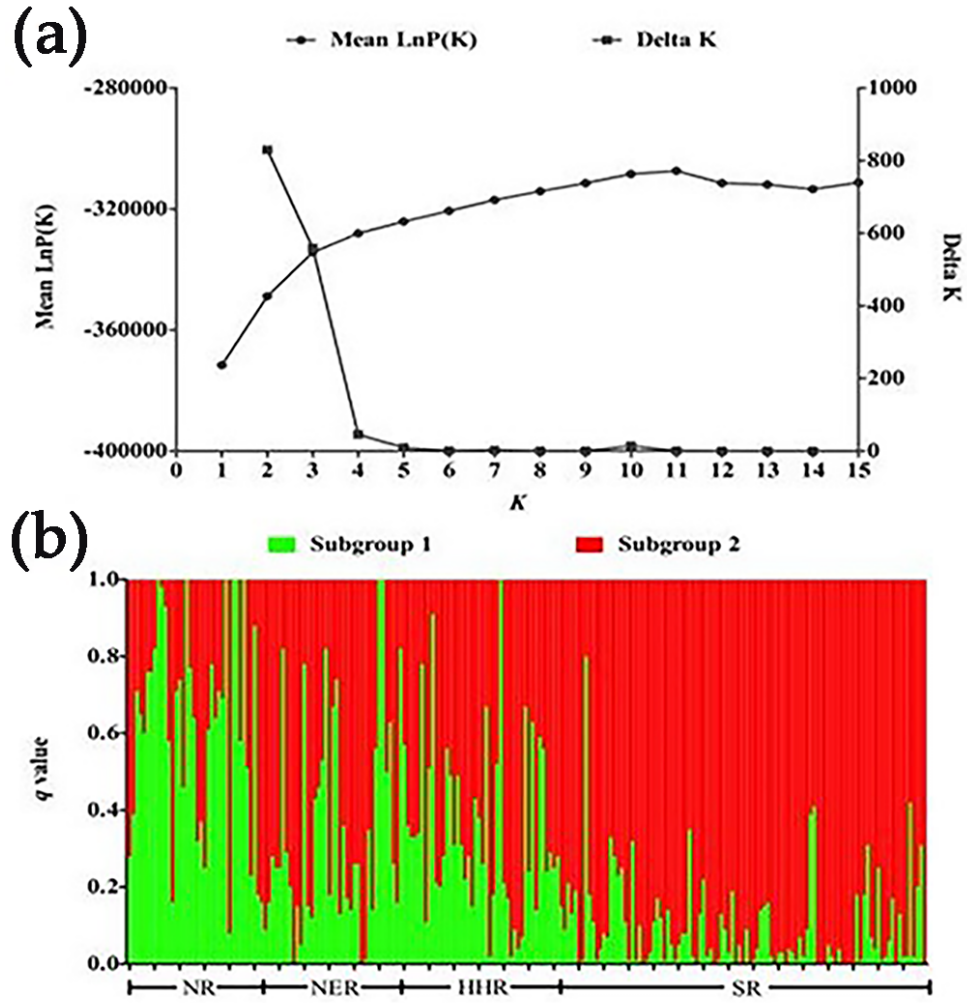

**Figure S3.** Population structure of soybean mini core collection.

Note: Figure (a) shows the LnP(D) and Delta K value when  $K$  from 1 to 15. Figure (b) shows the  $q$  value of 224 germplasm belonged to two subgroups. The subgroup 1 shows in green and subgroup 2 shows in red. The digits on the horizontal coordinate represent the geographical origin of soybean, and the vertical coordinate of each subgroup indicates the  $q$  value for each individual. NR: the northern soybean ecological region; NER: the northeast soybean ecological region; HHR: the Huanghuai region; SR: the southern soybean ecoregion [25].

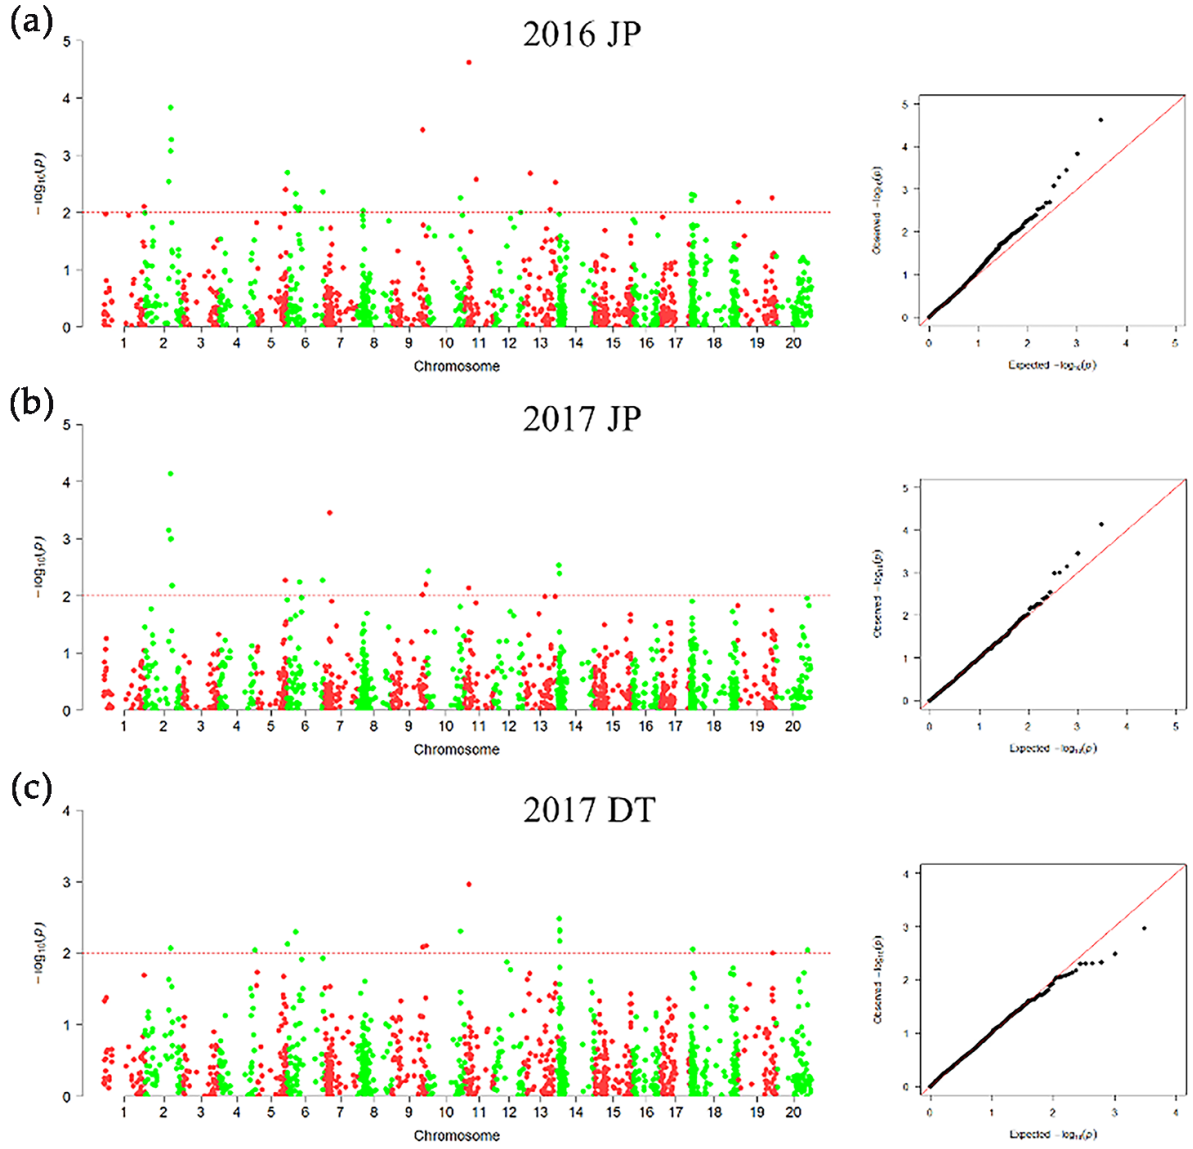

**Figure S4.** (a-c) Manhattan plots and Q-Q plots of GWAS for PH in 2016JP, 2017JP, and 2017DT, respectively. The horizontal red line indicates the genome-wide significance threshold ( $-\log_{10}(p) \geq 2$ ).

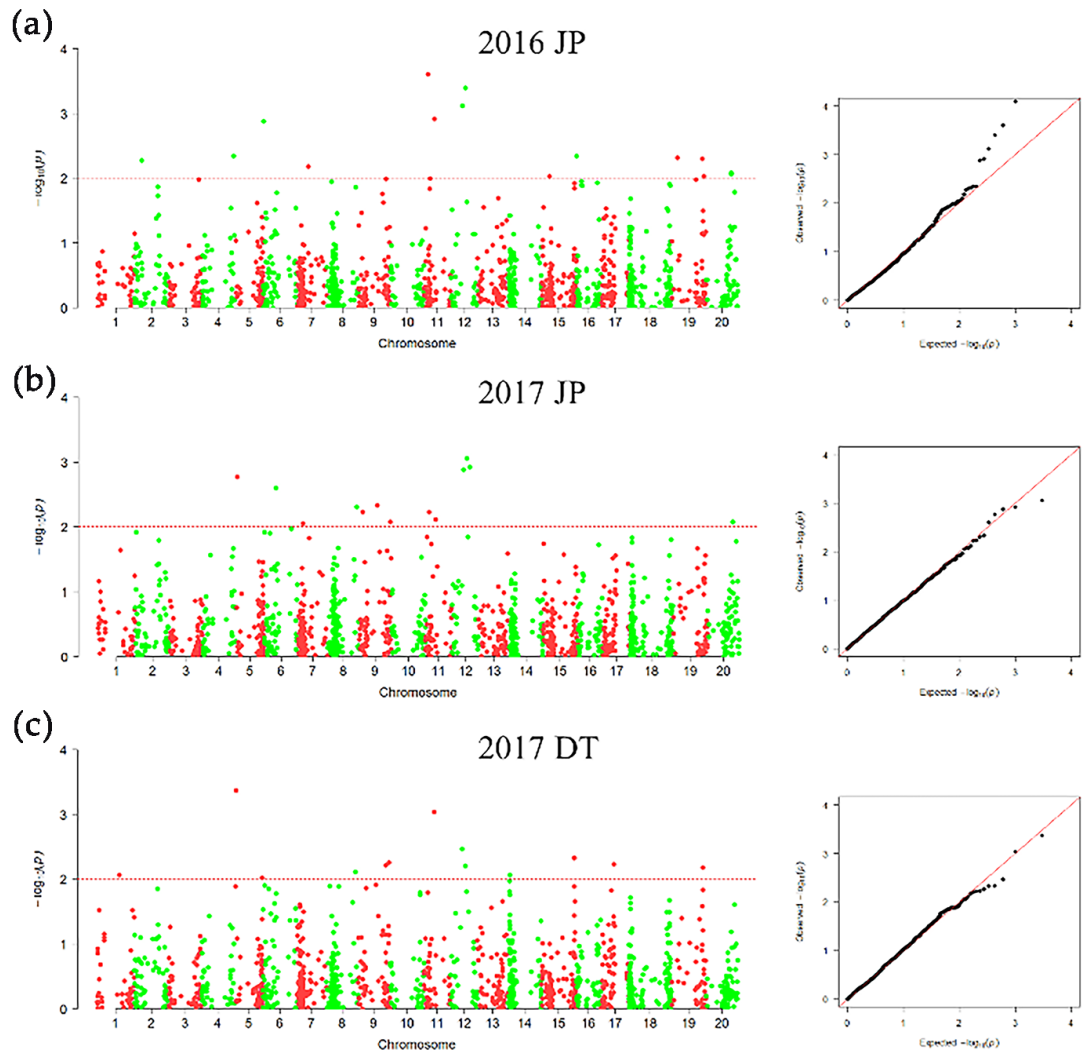

**Figure S5.** (a–c) Manhattan plots and Q-Q plots of GWAS for NN in 2016JP, 2017JP, and 2017DT, respectively. The horizontal red line indicates the genome-wide significance threshold ( $-\log_{10}(p) \geq 2$ ).

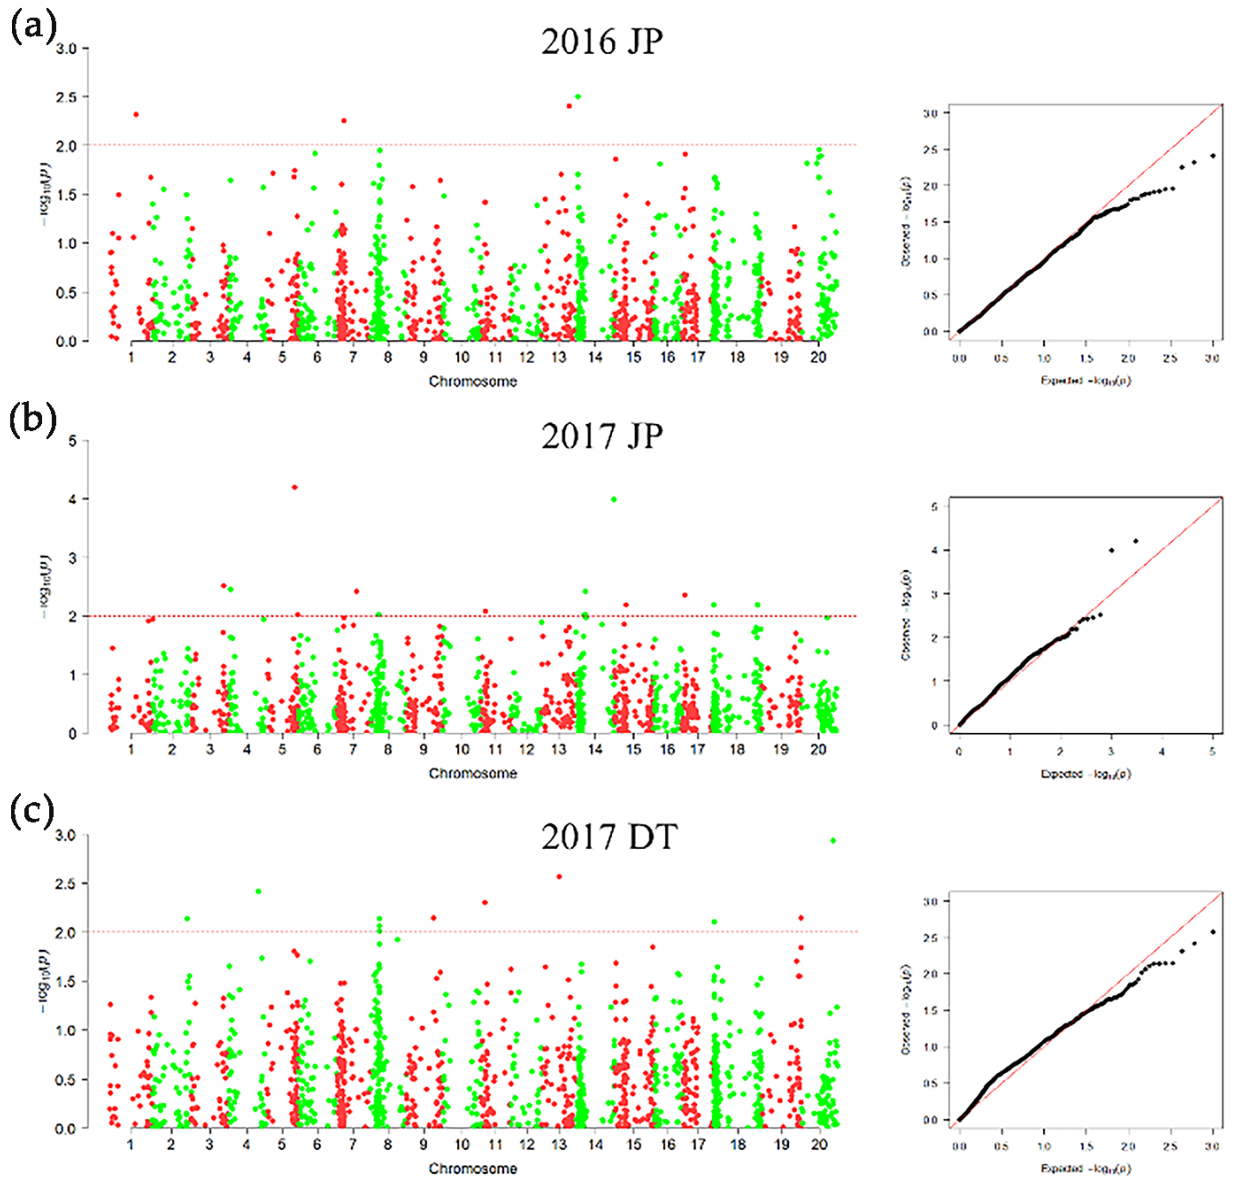

**Figure S6.** (a-c) Manhattan plots and Q-Q plots of GWAS for BN in 2016JP, 2017JP, and 2017DT, respectively. The horizontal red line indicates the genome-wide significance threshold ( $-\log_{10}(p) \geq 2$ ).

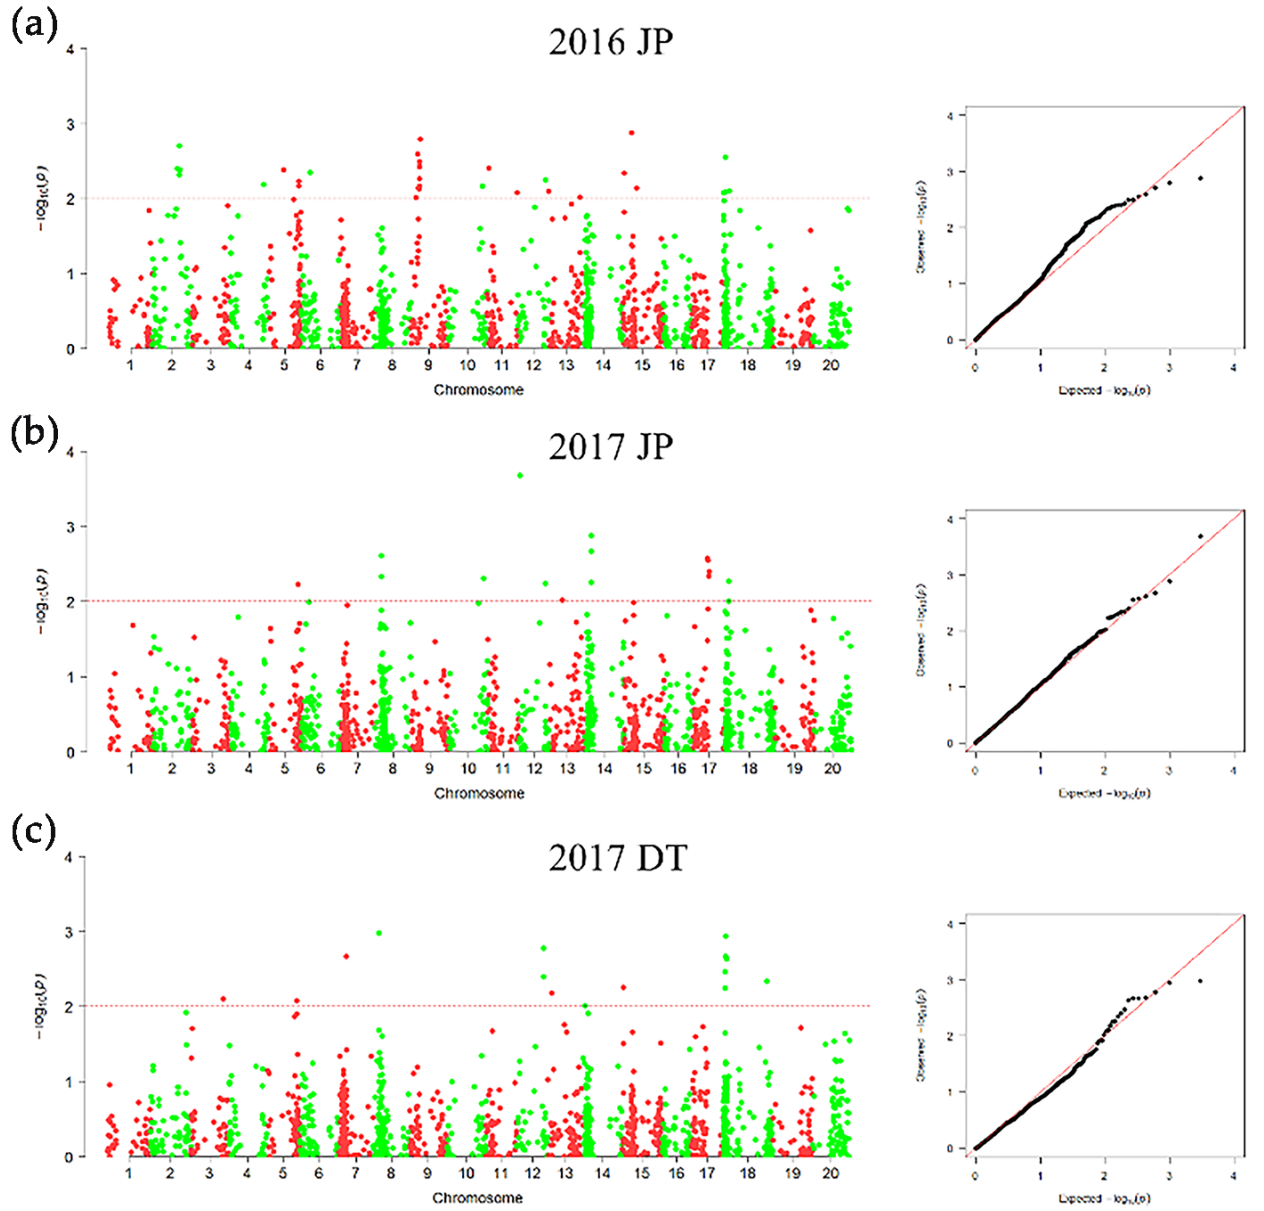

**Figure S7.** (a–c) Manhattan plots and Q-Q plots of GWAS for DI in 2016JP, 2017JP, and 2017DT, respectively. The horizontal red line indicates the genome-wide significance threshold ( $-\log_{10}(p) \geq 2$ ).
